# Supplementary material for: Probe exciplex structure of highly efficient thermally activated delayed fluorescence organic light emitting diodes
Source: PubMed Central journal article supplement (PMC6079109; doi:10.1038/s41467-018-05527-4), 2018-08-06
Supplement: 41467_2018_5527_MOESM3_ESM.pdf [file 41467_2018_5527_MOESM3_ESM.pdf]

## **Description of Additional Supplementary Files**

File Name: Supplementary Data 1

Description: The crystallographic information file of CN-Cz2

File Name: Supplementary Data 2

Description: The checking report of the CN-Cz2 CIF file
